# Supplementary material for: Photo-Assisted Removal of Rhodamine B and Nile Blue Dyes from Water Using CuO–SiO2 Composite
Source: MDPI journal article supplement (doi:10.3390/molecules27165343), 2022-08-22
Supplement: s1 [file s1]

## Supplementary Information (SI)

### Photo-Assisted Removal of Rhodamine B and Nile Blue Dyes from Water using CuO-SiO<sub>2</sub> Composite

Muhammad Yaseen<sup>1</sup>, Muhammad Humayun<sup>\*2</sup>, Abbas Khan<sup>\*1</sup>, Muhammad Idrees<sup>3</sup>, Nasrullah Shah<sup>1</sup>, and Shaista Bibi<sup>1</sup>

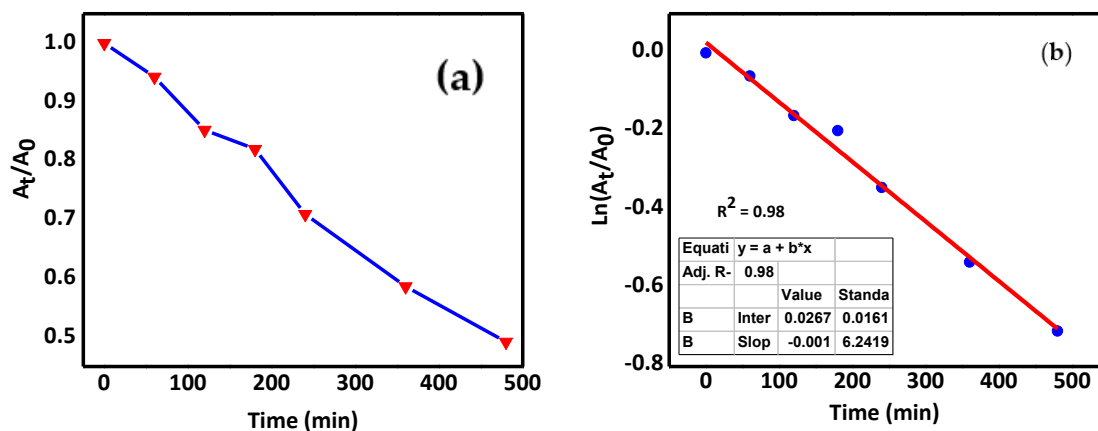

**Figure S1.** (a) Ratio of absorbances ( $A_0/A_t$ ) versus time, and (b) characteristic plot for pseudo first order kinetics of degradation for self-degradation of RhB in the absence of CuO-SiO<sub>2</sub> particles under light

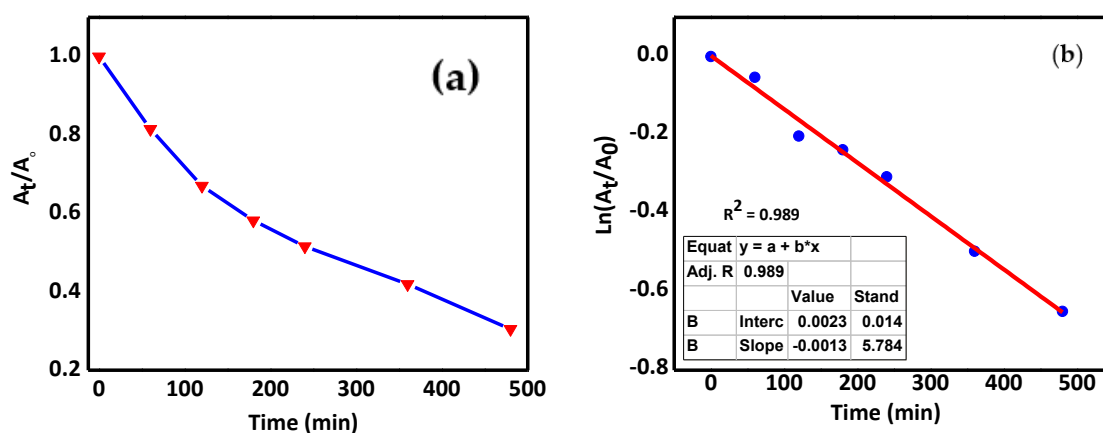

**Figure S2.** (a) Ratio of absorbances ( $A_0/A_t$ ) versus time, and (b) characteristic plot for pseudo first order kinetics of degradation for self-degradation of NB in the absence of CuO-SiO<sub>2</sub> particles under light.
